# Supplementary material for: Understanding dynamic friction through spontaneously evolving laboratory earthquakes
Source: PubMed Central journal article supplement (PMC5493769; doi:10.1038/ncomms15991), 2017-06-29
Supplement: ncomms15991-s1.pdf [file ncomms15991-s1.pdf]

File name: Supplementary Movie 1  
Description: Fault-parallel velocity
